17 **ABSTRACT**

18 The bowl-shaped structure of PIEZO channels is predicted to flatten in response to mechanical  
19 stimuli, gating their pore open. However, how this unique structure allows them to detect  
20 exquisitely small changes in membrane tension remains unclear. Here, using pressure clamp  
21 electrophysiology, modeling, and molecular dynamics simulations, we show that the single  
22 channel open probability of PIEZO1 increases weakly with respect to pressure-induced tension.  
23 In contrast, when multiple channels are present in a membrane patch, channel open probability  
24 increases steeply as a function of the number of open channels. These cooperative effects are  
25 consistent with an inter-channel energetic repulsion due to the local membrane deformation  
26 created by the non-planar PIEZO structure. When channels open, this deformation shrinks,  
27 allowing open channels to diffuse closer to each other, thus delaying closure. This study reveals  
28 how PIEZO1 channels acquire their exceptional mechanosensitivity and suggests a possible  
29 mechanism by which cells could rapidly tune mechanosensitivity.

30

## 31 INTRODUCTION

32 Mechanosensitive PIEZO1 and PIEZO2 channels contribute to an astonishing diversity of  
33 mechanosensory processes across most physiological systems<sup>1</sup>. PIEZO1 channels are directly  
34 sensitive to physical deformations of the lipid bilayer and thus do not require cellular  
35 components other than the cell membrane to sense mechanical forces<sup>2</sup>. PIEZO1's  
36 mechanosensitivity is best quantified using the pressure-clamp electrophysiology technique in  
37 which a membrane patch in a cell-attached mode is stretched by application of positive or  
38 negative pressure to the backside of the recording pipette. Using this technique, the membrane  
39 tension necessary to open PIEZO1 has been reported to be lower compared to other known  
40 mechanosensitive channels<sup>3-9</sup>. What mechanism confer PIEZO1 channels their exquisite  
41 mechanosensitivity?

42 The closed structure of homotrimeric PIEZO channels consists of three spiraling  
43 peripheral domains arranged around a central pore, defining a unique bowl-like architecture<sup>10-13</sup>.  
44 A prevailing gating mechanism posits that membrane stretch increases channel open probability  
45 by promoting a flatter channel conformation<sup>13,14</sup>. Owing to its unique bowl shape, the closed  
46 PIEZO structure is predicted to impose a large deflection to the surrounding lipid bilayer called  
47 PIEZO footprint<sup>15</sup>. The membrane deformation energy cost associated with the PIEZO footprint  
48 brings about work to flatten the bowl-shaped channel: as tension increases, so does this energy,  
49 potentially converting lateral membrane tension into flattening gating motion.

50 The footprint-based gating paradigm predicts PIEZO channels sense both membrane  
51 tension and curvature<sup>15</sup>. This idea is supported by two independent experimental results. First,  
52 PIEZO1 channels reconstituted into liposomes are more curved in smaller liposomes than they  
53 are in larger ones<sup>14</sup>. Second, PIEZO1 channels spontaneously open in absence of external force

54 when reconstituted into asymmetric (non-flat) artificial membranes, but not into symmetric (flat)  
55 ones<sup>2,16</sup>.

56 The sensitivity of PIEZO channels to the surrounding membrane curvature has surprising  
57 consequences. The overlap of adjacent PIEZO footprints would necessarily increase membrane  
58 deformation energy and thus is accompanied by an energy penalty. Unless sufficient energy is  
59 provided to overcome this penalty, neighboring channels are thus predicted to remain at bay<sup>15</sup>. If  
60 adjacent channels were allowed to move near each other and overlap their footprints, the  
61 increased membrane deformation energy would bring about tension-independent work to flatten  
62 them and increase open probability. Such a cooperative gating phenomenon has been observed in  
63 Molecular Dynamics (MD) simulations in which periodically mirrored PIEZO1 channels,  
64 virtually brought near each other by reducing the spatial dimensions of the simulated system,  
65 overlap their footprints and spontaneously flatten, enabling their pore to open<sup>17</sup>.

66 In this study, we sought to determine whether such cooperative effects occur in living  
67 cells. Using pressure-clamp electrophysiology, we show that single PIEZO1 channels are weakly  
68 mechanosensitive but dramatically increase open probability as more channels open in  
69 multichannel recordings, indicating strong cooperative interactions. Because the size of the  
70 PIEZO footprint depends on channel curvature, the footprint of flatter open channels is predicted  
71 to be smaller than that of more curved closed channels. Thus, PIEZO1 channels should diffuse  
72 closer to each other when they are open, as confirmed here by MD simulations. When open  
73 channels diffuse near each other, their closure would instantly extend their footprints, incurring a  
74 footprint overlap energy penalty. Open channels are thus anticipated to remain open for longer  
75 periods of time as more open channels diffuse around them, consistent with our observation that  
76 the closure rate decreases as the maximal amplitude of PIEZO1-mediated currents increases.

## 77 RESULTS

### 78 Single PIEZO1 channels are weakly mechanosensitive

79 To test whether PIEZO1 gating is influenced by intermolecular cooperative effects, we  
80 transfected HEK293T<sup>ΔP1</sup> cells (where endogenous PIEZO1 expression is abolished<sup>18</sup>) with a  
81 plasmid encoding mouse PIEZO1 and measured mechanically-evoked currents in these cells  
82 using the pressure clamp technique in the cell-attached configuration. While patches from  
83 untransfected cells did not produce mechanically-evoked currents, patches from transfected cells  
84 yielded robust pressure-dependent inward currents. By incrementally increasing the amplitude of  
85 pipette suction pulse (negative pressurization), the amplitude of these currents saturates (Figure  
86 1a). We noticed that when the saturating currents were large, they tend to decay exponentially, a  
87 hallmark of PIEZO1 channel inactivation. However, when these currents were small, inactivation  
88 was slower (Supplementary Figure 1). Plotting the relative peak current (before inactivation  
89 sets),  $\frac{I}{I_{max}}$ , as a function of the pressure pulse,  $p$ , produces sigmoid-like curves that tend to be  
90 shifted toward more negative pressures as  $I_{max}$  decreases (Figure 1b). These sigmoid curves can  
91 be well fitted using a classical Boltzmann equation (see Supplementary Appendix 1):

$$92 \quad \frac{I}{I_{max}} = \frac{1}{1 + e^{(p-p_{1/2}^{app})\epsilon}} \quad (1a)$$

93 With  $p_{1/2}^{app}$  the apparent pressure value producing half of the maximal current ( $\frac{I}{I_{max}} = 0.5$ ), and  
94  $\epsilon$ , a slope factor. We compiled 22 independent macroscopic recordings, fitted the corresponding  
95  $p_{1/2}^{app}$  values, and plotted them as a function of the estimated number of channels in the patch.  
96 The number was obtained by divided  $I_{max}$  by the single channel current amplitude. In our  
97 experimental conditions (-100 mV transmembrane voltage and 140 mM KCl pipette solution),  
98 the unitary current was  $\approx 5.5$  pA. This plot shows that, as more channels populate the patch, the

99 fitted  $p_{1/2}^{app}$  values tend to be less negative (Figure 1c). This suggests that large PIEZO1 channel  
 100 populations have a lower activation threshold compared to smaller channel populations.  
 101 To determine the inherent mechanosensitivity of single PIEZO1 channels, we next

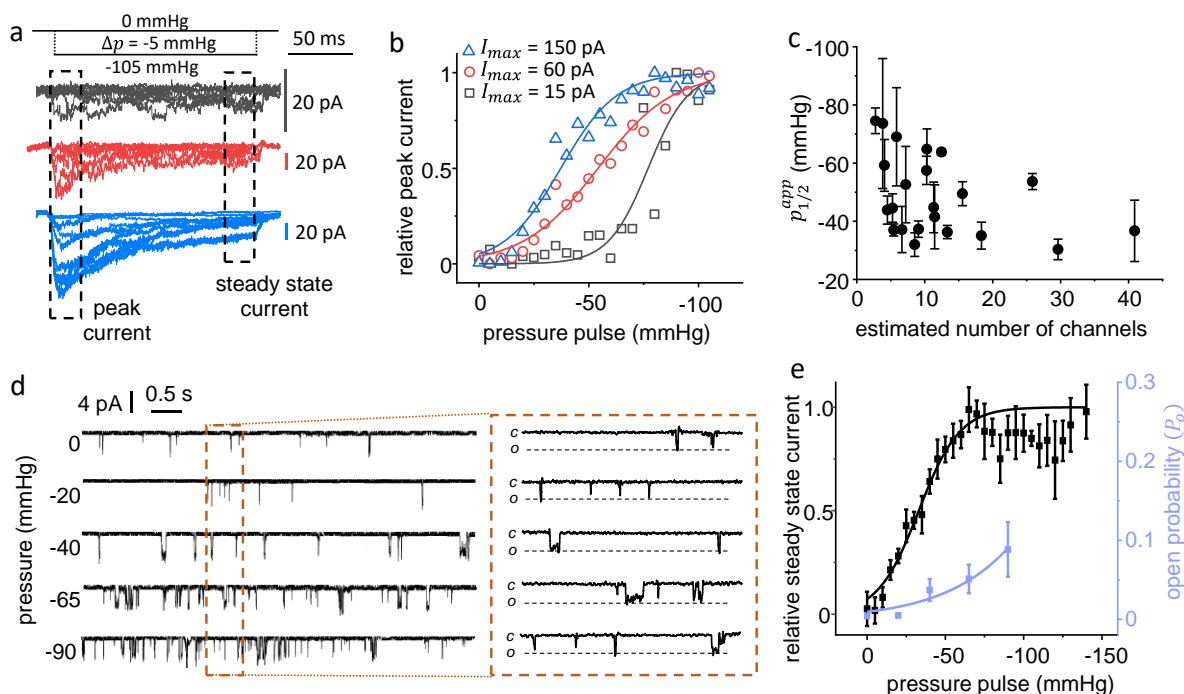

**Figure 1. PIEZO1's mechanosensitivity depends on the number of channels in a patch.** (a) Examples of pressure-elicited PIEZO1 currents in patch with varying peak current amplitude.  $V = -100$  mV (b) Relative peak current from data in (a) plotted as a function of pulse pressure. (c) The apparent half-activation pressure obtained from individual patches is plotted as a function of the estimated number of active channels in the patch. Error bars = standard deviation from fit with equation (1a). (d) Example of 20 sec-long single channel recordings obtained at the indicated steady state pressure. 500 ms snippets from each trace are shown in the insert. (e) Comparison of the PIEZO1 pressure activation curve obtained in steady state conditions for single channel patches (violet circles; number of independent patches/pressure in mmHg: 2/0, 6/-20, 5/-40, 4/-65, and 4/-90) and for macroscopic patches (black circles, 11 independent patches). Error bars = s.e.m.

102 obtained > 60 sec-long single channel recordings from patches maintained at a steady-state  
 103 negative pressure (Figure 1d). The dwell times of opening and closure events follow mono or  
 104 dual gaussian distributions when plotted in a logarithmic time scale, indicating the duration of

105 our recordings was long enough to capture ensembles of stochastic gating events (Supplementary  
106 Figure 2a). To rule out the presence of multiple channels, we applied a strong pressure pulse at  
107 the end of each record and discarded those containing more than one conductance level  
108 (Supplementary Figure 2b). In agreement with our observation that PIEZO1-mediated currents  
109 do not decay when their saturating amplitude is low, single PIEZO1 channels did not exhibit  
110 time-dependent loss of activity across the length of our recordings in our experimental  
111 conditions. The single channel open probability,  $P_o$ , was very low and only increased from  $\approx$   
112 0.005 to  $\approx$  0.1 when pressure decreased from 0 to -90 mmHg (Figure 1e). Sustained patch  
113 pressurization below -90 mmHg induced electrical instability and membrane rupture, precluding  
114 accurate  $P_o$  determination at more negative pressures. We fitted the  $P_o$  vs.  $p$  plot using the  
115 following Boltzmann equation (see Appendix 1):

$$116 \quad P_o = \frac{P_o^{max}}{1 + e^{(p-p_{1/2})\varepsilon}} \quad (1b)$$

117 Because  $P_o$  does not saturate between -65 and -90 mmHg, our data does not allow us to reliably  
118 estimate  $P_o^{max}$ . Although increasing tension is predicted to promote an open state by gradually  
119 stabilize a flat channel conformation, it is unclear whether the flat conformation is associated  
120 with an open probability of 1. Assuming  $P_o^{max} = 1$ , fitting our single channel data with equation  
121 (1b) yields  $p_{1/2} = -178 \pm 19$  mmHg and  $\varepsilon = 0.026 \pm 0.006$  mmHg<sup>-1</sup> ( $R^2 = 0.946$ ). Assuming  
122  $P_o^{max} = 0.1$  (the minimum possible value according to our data) the fit yields  $p_{1/2} = -58 \pm 5$   
123 mmHg and  $\varepsilon = 0.053 \pm 0.011$  mmHg<sup>-1</sup> ( $R^2 = 0.957$ ) (Table 1). To compare single channel vs.  
124 macroscopic data in similar steady-state conditions, we plotted the relative steady-state current,  
125  $\frac{I}{I_{max}}$ , obtained from macroscopic patches with at least  $\approx$  20 channels ( $I_{max} < -100$  pA) as a  
126 function of pressure and fitted this trace with equation (1a) (Figure 1e). The fit yields  $p_{1/2}^{app} =$

127  $33.0 \pm 1.5$  mmHg and  $\varepsilon = 0.077 \pm 0.009$  mmHg<sup>-1</sup> ( $R^2 = 0.927$ ). For comparison, when  $\frac{I}{I_{max}}$  is  
 128 taken at the peak current,  $p_{1/2}^{app}$  was slightly lower ( $-25 \pm 2$  mmHg) and  $\varepsilon$ , slightly larger ( $0.117 \pm$   
 129  $0.018$  mmHg<sup>-1</sup>) (Supplementary Figure 3). Under the  $P_o^{max} = 1$  assumption, our data show that  
 130 the pressure necessary to elicit half of the maximal current for a large channel population  
 131 decreases by about 6-fold and the slope factor of the pressure-activation curve increases by about  
 132 3-fold compared to single channels. Under the  $P_o^{max} = 0.1$  assumption, our data still suggest the  
 133 PIEZO1 mechanosensitivity is weaker for single channel ( $p_{1/2}$  shifted towards more negative  
 134 values and smaller  $\varepsilon$ ) compared to channel populations, albeit to a lower extent.  
 135

| $P_o^{max}$ | $P_{1/2}$ (mmHg) | $\varepsilon$ (mmHg <sup>-1</sup> ) | $R^2$ |
|-------------|------------------|-------------------------------------|-------|
| 1           | $-178 \pm 19$    | $0.026 \pm 0.006$                   | 0.946 |
| 0.9         | $-174 \pm 19$    | $0.026 \pm 0.005$                   | 0.946 |
| 0.8         | $-168 \pm 17$    | $0.026 \pm 0.005$                   | 0.946 |
| 0.7         | $-161 \pm 16$    | $0.027 \pm 0.005$                   | 0.947 |
| 0.6         | $-154 \pm 15$    | $0.027 \pm 0.005$                   | 0.947 |
| 0.5         | $-145 \pm 13$    | $0.028 \pm 0.005$                   | 0.948 |
| 0.4         | $-133.5 \pm 11$  | $0.028 \pm 0.005$                   | 0.949 |
| 0.3         | $-118 \pm 9$     | $0.030 \pm 0.005$                   | 0.951 |
| 0.2         | $-96 \pm 6$      | $0.033 \pm 0.006$                   | 0.956 |
| 0.1         | $-58 \pm 5$      | $0.053 \pm 0.011$                   | 0.957 |

136  
 137 **Table 1:** Single channel parameters obtained by fitting the single channel pressure-activation  
 138 curve (Figure 1e) using equation (1b) and assuming different  $P_o^{max}$  values.

139  
 140 **PIEZO1 channel populations do not gate independently**

141 To further explore how modulating the number of channels affects their mechanosensitivity, we  
 142 obtained steady-state current traces exhibiting more than one open conductance levels (Figure



143 2a). We estimated the total number of channels,  $n$ , by taking the maximal conductance level  
144 observed during at least 60 seconds of continuous recording. Since the inherently large electrical  
145 noise of large channel populations reduce the accuracy of our estimates of  $n$ , we arbitrarily  
146 selected traces with  $n < 15$ . Although most patches harbored many more channels, we were able  
147 to collect a total of 63 multichannel records with  $2 < n < 15$  at 3 distinct patch pressures (-20, -  
148 40, and -90 mmHg). Since it was not possible to predict the number of channels per patch, we  
149 were not able to obtain all possible  $n$  values at all tested pressures or to obtain replicates for some  
150 combinations of patch pressure and channel number. In our multichannel traces, the dwell time  
151 of each conductance level plotted on a logarithmic time-axis display a bell-shape resembling a  
152 gaussian distribution, suggesting our sampling duration was long enough for meaningful  
153 statistical analysis (Supplementary Figure 4a). Regardless of patch pressure, we found that the  
154 maximal number of channels did not increase when applying a strong test pulse at the end of our  
155 recordings, further validating our estimation of the total number of channels (Supplementary  
156 Figure 4b). In agreement with previous observations, channel activity did not diminish over time,  
157 supporting the notion that inactivation does not appear to take place when few channels are  
158 present in the patch (Supplementary Figure 5).

159 For each tested pressure, an event extraction analysis allowed us to determine  $P_i^n$ , the  
160 probability of  $i$  channels being open in a patch containing  $n$  channels, as a function of  $i$  (see  
161 Methods). If PIEZO1 channels were gating independently, the observed  $P_i^n$  would follow the  
162 combinatorial equation (see Supplementary Appendix 2.1):

163 
$$P_i^n = \binom{n}{i} (P_o)^i (1 - P_o)^{(n-i)} \quad (2)$$

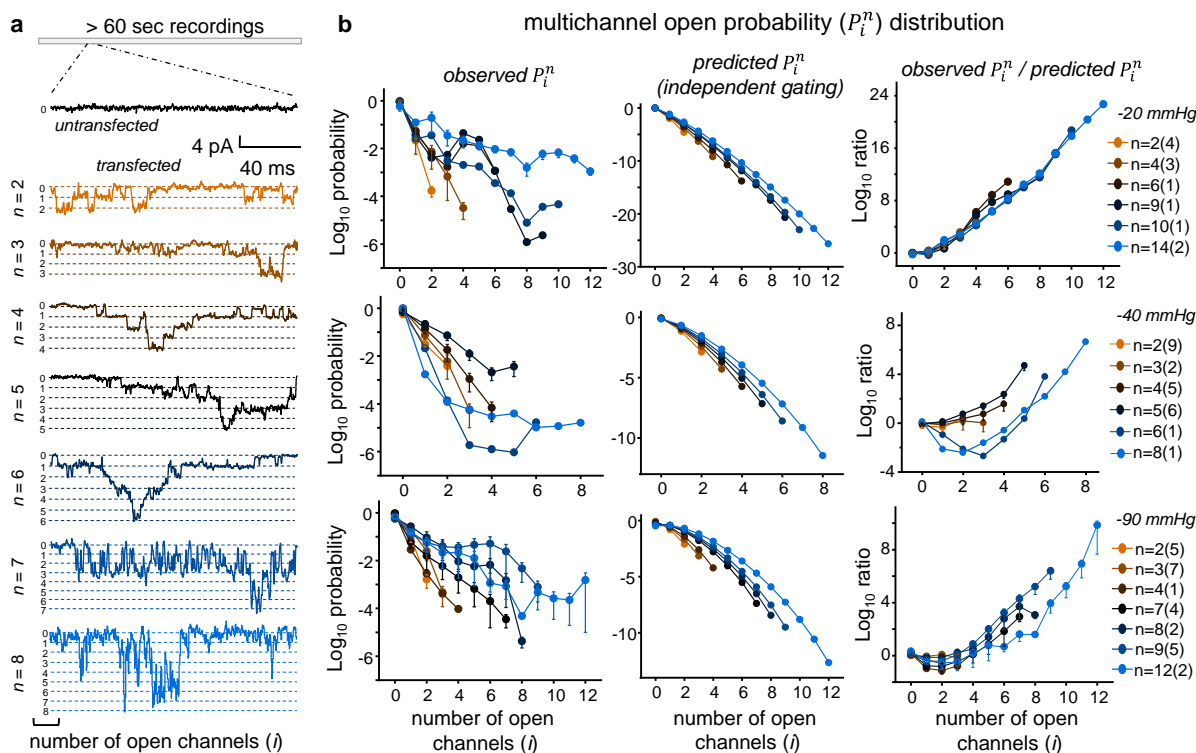

**Figure 2. PIEZO1 channels do not gate independently in multichannel patches.** (a) Representative snippets from multichannel current traces from patches pressurized at -40 mmHg and containing a variable number of channels ( $V = -100$  mv). (b) The observed probability of  $i$  channels to be open in a patch containing  $n$  channels ( $P_i^n$ ) is compared with the  $P_i^n$  predicted by equation (2) for independent channels. In panels (a) and (b), the color gradient represents the number of channels in the patch. In the legend of panel (b), the number in parentheses indicate the number of independent patches for each  $n$  value. Error bars = s.e.m. Continuous lines connecting discrete probability values have no physical meaning and are displayed for clarity only.

164 Using  $P_o$  values from Figure 1e, equation (2) poorly predicts the observed  $P_i^n$  (Figure 2b). The  
 165 discrepancy between the  $P_i^n$  observed from multichannel recordings and those calculated under  
 166 the assumption of independent gating can be visualized by plotting the ratio of observed vs.  
 167 predicted  $P_i^n$ : for all tested pressures, this ratio tends to increase in a logarithmic manner by  
 168 many orders of magnitude as the value of  $i$  increases, regardless of the total number of channels  
 169 present in the patch (Figure 2b). By contrast, the  $P_i^n$  obtained from MATLAB simulations in

170 which multiple channels gate independently are well described by equation (2) (Supplementary  
171 Figure 6).

172

### 173 **Modelization of inter-channel cooperativity**

174 For simplification, we postulate that the discrete gating transitions observed in multichannel  
175 patches are predominantly mediated by transitions between two states, closed (C) and open (O):

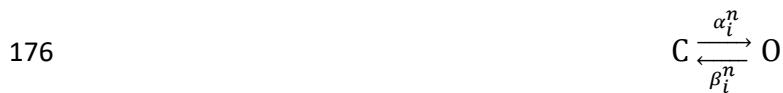

177 with  $\alpha_i^n$  and  $\beta_i^n$ , respectively the microscopic opening and closure rate in patches containing  $i$   
178 open channels and  $n$  total channels. Since the  $P_i^n$  values appear to increase as a function of the  
179 number of open channels in the patch, we hypothesize that the thermodynamic constant driving

180 the closed/open equilibrium,  $\frac{\alpha_i^n}{\beta_i^n}$ , scales by a constant parameter,  $k$ , for each iteration of  $i$ :

$$181 \quad \frac{\alpha_{i+1}^n}{\beta_{i+1}^n} = k \frac{\alpha_i^n}{\beta_i^n}$$

182 This sequential cooperative model leads to the following expression to predict  $P_i^n$  (see  
183 Supplementary Appendix 2.1):

$$184 \quad P_i^n = \frac{\binom{n}{i} k^{\binom{i}{2}} \left(\frac{P_o}{1-P_o}\right)^i}{\sum_{i=0}^n \binom{n}{i} k^{\binom{i}{2}} \left(\frac{P_o}{1-P_o}\right)^i} \quad (3)$$

185 In this model, inter-channel cooperativity is positive when  $k > 1$  and negative when  $0 < k < 1$ .

186 When  $k = 1$ , equation (3) is mathematically equivalent to equation (2) for independent channels  
187 (see Supplementary Appendix 2.1). It is noteworthy that the  $k$  exponent in equation (3) is a

188 binomial coefficient that represents the number of combinations of pairs of open channels. Since

189  $P_o$  and  $n$  are experimentally known from our single and multichannel recordings, the only

190 unknown fitted parameter in equation (3) is  $k$ . We log-transformed the  $P_i^n$  data and calculated the  
 191 Mean Absolute Error (MAE) between observed  $P_i^n$  and the  $P_i^n$  values calculated using equation  
 192 (3) by varying  $k$  (see Methods). MAE minimization yielded optimal  $k$  values of about 2.25, 1.65,

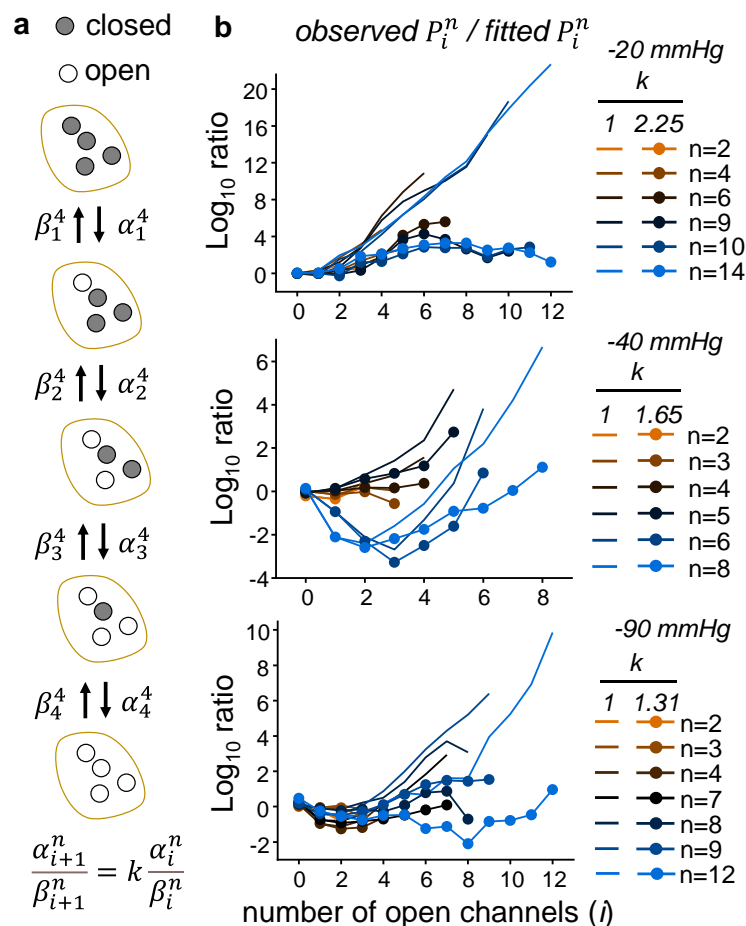

**Figure 3. Predicting PIEZO1 multichannel open probabilities with a sequential cooperativity gating model.** (a) Schematic illustration of the gating model in which  $k$  represents the cooperativity parameter. (b) The ratio of observed vs. fitted mean  $P_i^n$  values is plotted for each tested pressure (lines with full circles). These plots are compared with those obtained assuming no cooperativity ( $k = 1$ , continuous lines). Data and coloring methods are from Figure 2.

193 and 1.31 for patch pressures of -20, -40, and -90 mmHg, respectively (Figure 3b and  
 194 Supplementary Figure 7). Plotting the ratio between observed and fitted  $P_i^n$  as a function of  $i$   
 195 shows our sequential model fits well our data at -20 and -90 mmHg, as evidenced by the

196 convergence of these ratios towards unity along the  $i$  dimension (Figure 3b). This convergence  
 197 was not as good for patches at -40 mmHg, presumably due to noisier data.

198 We additionally tested two variants of this model. The first one states that the PIEZO1  
 199 activation constant,  $\frac{\alpha_i^n}{\beta_i^n}$ , scales by  $k$  for each iteration of  $n$  instead of  $i$ . In this "numeral" model,  
 200 the exponent of the  $k$  parameter equals  $i(n-1)$  (Supplementary Appendix 2.2). In the second  
 201 variant, the exponent of the  $k$  parameter was arbitrarily set to  $i(2n-i-1)/2$ , i.e. the number of  
 202 combinations of channel pairs in which at least one channel is open. MAE minimization shows  
 203 that the sequential model produces slightly smaller errors compared to these variants (Table 2).  
 204 In addition, the shape of the observed  $P_i^n$  distribution (Figure 2b) more closely resembles the U-  
 205 shaped distribution predicted by the sequential model rather than the rainbow-shaped distribution  
 206 predicted by the two other models (Supplementary Figure 8).

207

208

| exponent of $k$ parameter     | patch pressure (mmHg) | fitted $k$ value | MAE  |
|-------------------------------|-----------------------|------------------|------|
| $\binom{i}{2}$ ; equation (3) | -20                   | $2.25 \pm 0.055$ | 1.64 |
|                               | -40                   | $1.65 \pm 0.080$ | 0.84 |
|                               | -90                   | $1.31 \pm 0.018$ | 0.89 |
| $i(n-1)$                      | -20                   | $1.48 \pm 0.012$ | 1.72 |
|                               | -40                   | $1.24 \pm 0.027$ | 0.92 |
|                               | -90                   | $1.05 \pm 0.007$ | 1.05 |
| $\frac{i(2n-i-1)}{2}$         | -20                   | $2.00 \pm 0.031$ | 1.79 |
|                               | -40                   | $1.20 \pm 0.047$ | 0.98 |
|                               | -90                   | $1.15 \pm 0.014$ | 1.21 |

209

210 **Table 2:** Comparison of fitted  $k$  values and minimal MAE for the three cooperativity models tested  
 211 in this study.

212

213

## 214 **Estimating the number of cooperating channels**

215 How many channels energetically cooperate, on average, in macroscopic recordings? Our  
216 sequential model relates this number,  $n$ , to the relative macroscopic current elicited upon acute  
217 pressure stimulation (see Appendix 3):

$$218 \quad \frac{I}{I_{max}} = \frac{\sum_{i=0}^n \binom{n}{i} i \langle k \rangle^{\binom{i}{2}} (e^{(p_{1/2}-p)\varepsilon})^i}{n \sum_{i=0}^n \binom{n}{i} \langle k \rangle^{\binom{i}{2}} (e^{(p_{1/2}-p)\varepsilon})^i} \quad (4)$$

219 The values of  $p_{1/2}$  and  $\varepsilon$  depend on  $P_o^{max}$  and are obtained from fitting the single channel  
220 pressure-activation curve using equation (1b) (Figure 1e). Because  $k$  varies with  $p$ , we averaged  $k$   
221 values fitted from multichannel records at all tested pressures ( $\langle k \rangle$ ). Accordingly, the only  
222 unknown parameter in equation (4) is  $n$ . We compiled a range of macroscopic pressure-  
223 activation curves for PIEZO1 based on our data and that from others. These curves are described  
224 by equation (1a) with  $p_{1/2}^{app}$  ranging from -25 to -40 mmHg and  $\varepsilon$  ranging from 0.08 to 0.1<sup>2-4,19-</sup>  
225 <sup>21</sup>. These experimental pressure-activation curves are consistent with those predicted by equation  
226 (4) with  $n$  values equal to 14-15 assuming  $P_o^{max} = 1$ , 11-13 assuming  $P_o^{max} = 0.5$ , 9 assuming  
227  $P_o^{max} = 0.2$ , and 7 assuming  $P_o^{max} = 0.1$  (Figure 4). Interestingly, the pressure-activation curve  
228 predicted by equation (4) with  $P_o^{max} = 0.2$  and  $n = 9$  seems to best overlap with the consensus  
229 experimental curve.

230

## 231 **A diffusion-based mechanism for PIEZO1 cooperativity**

232 The seemingly complex inter-channel cooperativity behavior of PIEZO1 channels can be  
233 explained by a simple mechanism based on channel diffusion and membrane energetics. As  
234 mentioned earlier, the PIEZO1 gating free energy increases if adjacent channels overlap their  
235 footprints. However, the First Law of Thermodynamics posits that this added energy constitutes

236 a penalty. Therefore, the footprint overlap is energetically unfavorable unless this penalty is paid  
 237 for by another energy source. This energy source could originate, for example, from inter-  
 238 channel collisions, from the motions of molecular motors tethered to the channels *via*

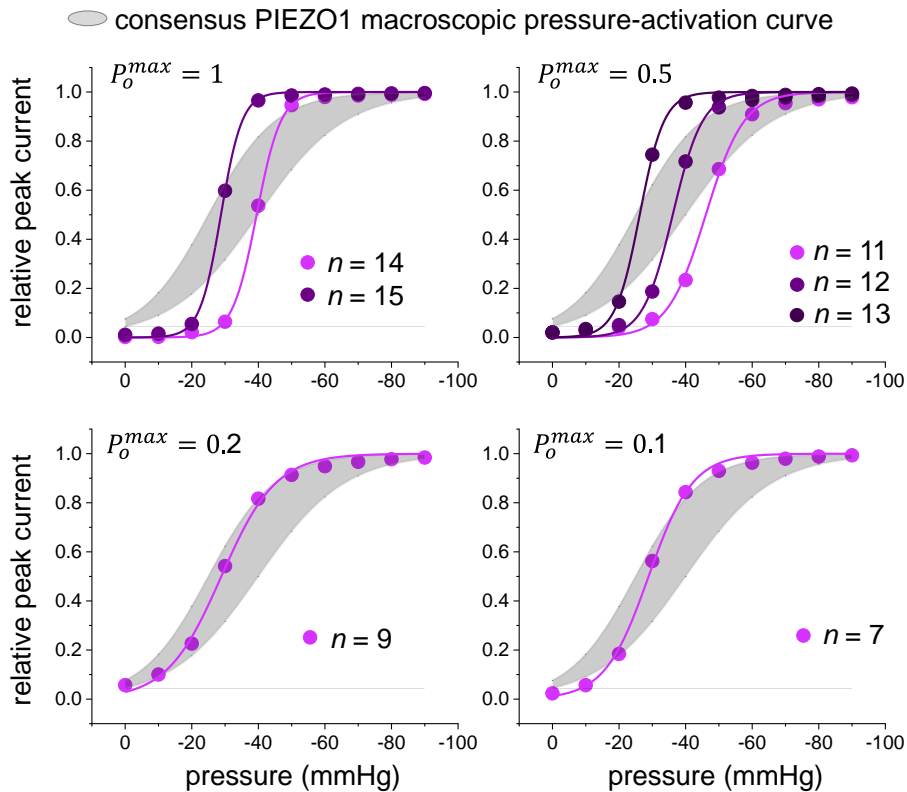

**Figure 4. Estimation of the number of cooperating PIEZO1 channels in macroscopic patches.**

The grey areas represents a consensus pressure-activation curve obtained from independent studies (see text). Colored lines represent hypothetical pressure-activation curves obtained using equation (4) that more closely overlap with the consensus curve assuming different values of  $P_o^{max}$ . In each case, the fitted discrete number of cooperating channels ( $n$ ) is indicated.

239 cytoskeletal elements<sup>22</sup>, or from the segregation of channels into lipid microdomains<sup>23</sup>. In such  
 240 cases, however, the cooperative effects would increase as a function of the total number of  
 241 channels, not as a function of the number of open channels. What mechanism could thus mediate  
 242 the cooperative behavior of PIEZO1 channels without utilizing the additional gating free energy  
 243 brought about by overlapping adjacent footprints?

244 When PIEZO channels open, their structure is predicted to adopt a flatter conformation.  
245 The footprint of open channels is therefore predicted to be smaller than that of closed channels,  
246 enabling open channels to diffuse closer to each other. When open channels are near each other,  
247 channel closure would return the channel to a curved shape, instantly extending the channel  
248 footprint. This footprint extension would likely overlap with that of adjacent channels, instantly  
249 incurring the footprint overlap energy penalty. When open channels diffuse near each other, their  
250 closure is thus expected to become thermodynamically unfavorable, enabling clustered open  
251 channels to remain open for longer periods of time compared to their isolated counterparts  
252 (Figure 5).

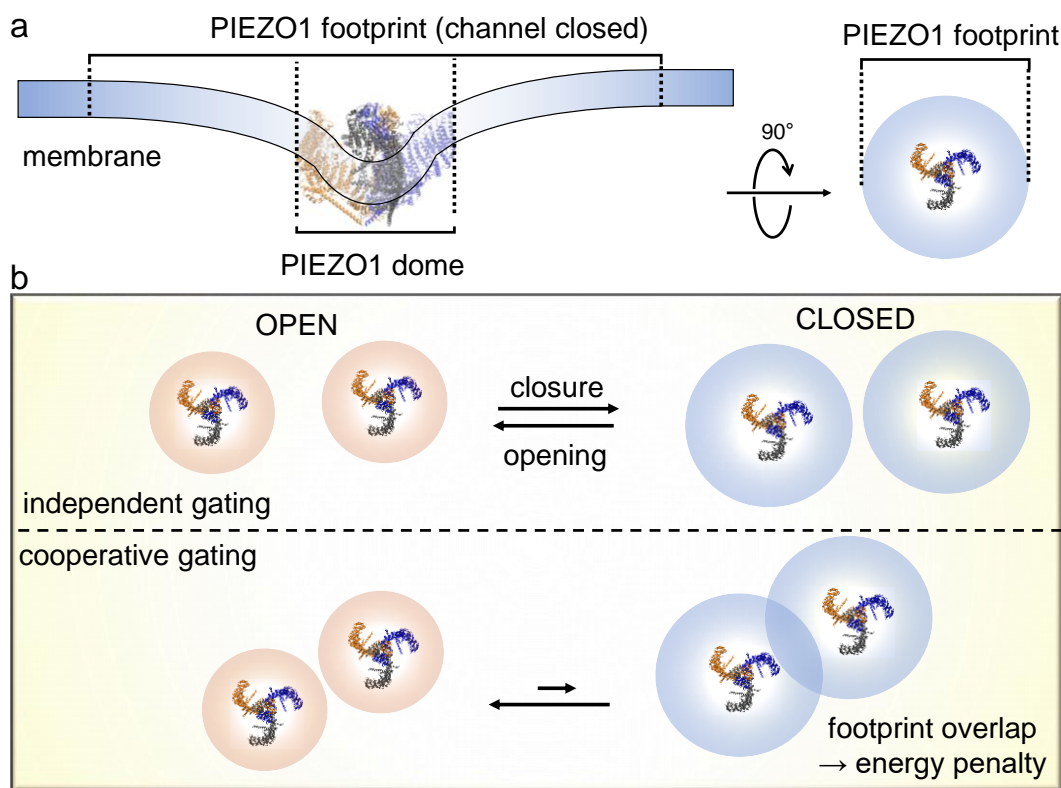

**Figure 5. Proposed inter-channel cooperative gating mechanism for PIEZO1.** (a) Schematic illustration of the PIEZO1 footprint and dome for a closed channel. (b) Due to their flatter conformation, open PIEZO1 channels produce smaller footprints. When open channels are near each other, their closure would overlap their footprints, incurring an energy penalty.



## 253 Validation of the proposed cooperativity mechanism

254 A central tenet of our cooperative mechanism states that PIEZO1 channels diffuse closer to each  
255 other when they are open as compared to when they are closed. To test this assumption, we used

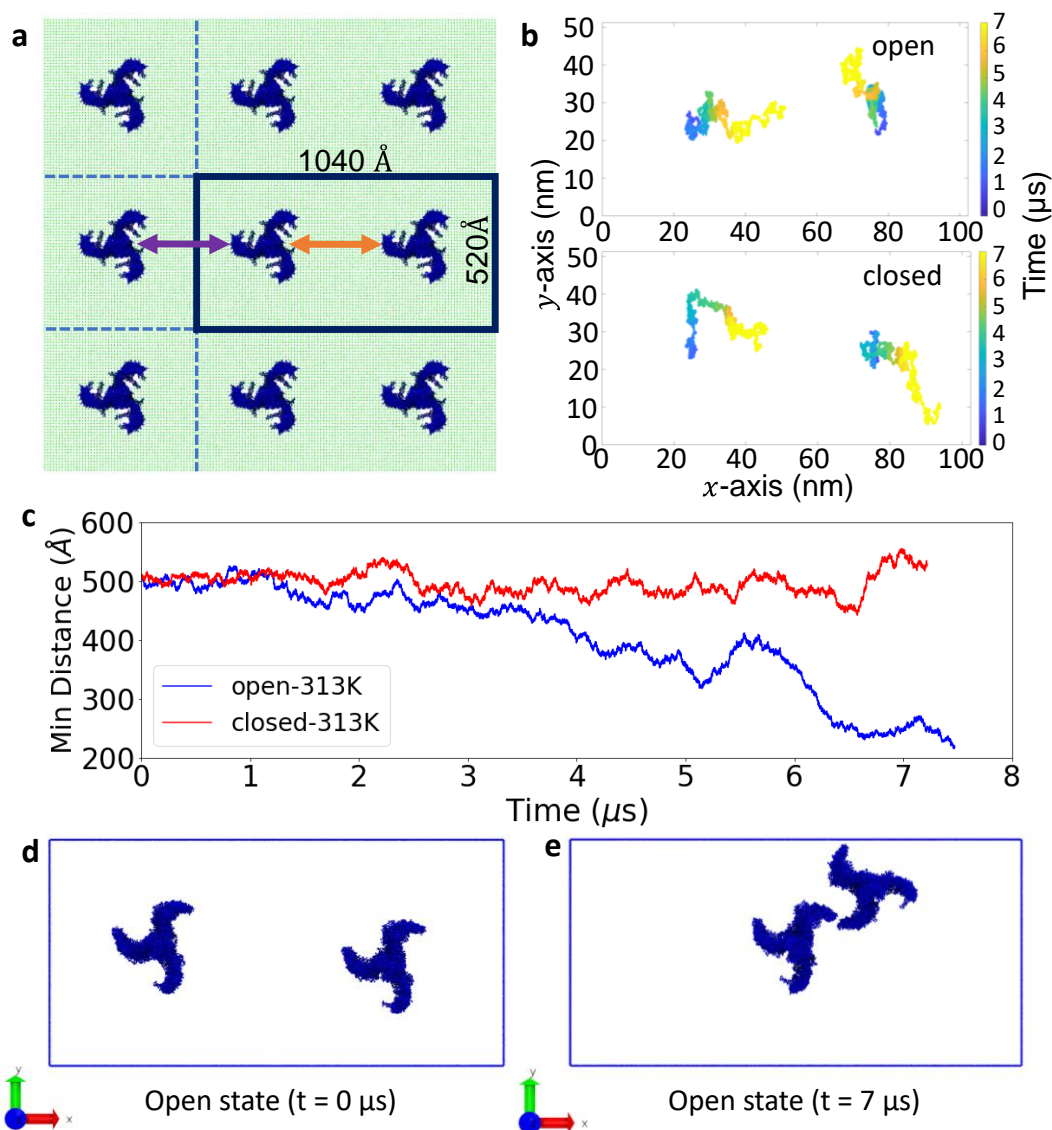

**Figure 6. PIEZO1 channels diffuse closer when they are open in coarse-grained MD simulations.**

(a) A pair of closed channels is shown in the simulated box (delineated by the black perimeter) and in surrounding periodic images. Arrows indicate minimum pore-pore distance between one channel and its counterpart in the same (orange) or a mirrored (purple) box. (b) Temporally-colored trajectories of the diffusion of the center of mass of each closed channel. (c) Time course of minimum pore-pore distance between pairs of open (blue) or closed (red) channels at 313 K. Snapshots of the open channels simulation are shown at the beginning (d) or at the end (e) of the simulation.

256 coarse-grained (CG) simulations to determine the minimal inter-channel distance between pairs  
257 of open or closed channels diffusing for  $\approx 7 \mu\text{s}$  in a  $52 \times 104 \text{ nm}$  membrane at 313 or 340 K. The  
258 spatial coordinates corresponding to the open and closed conformations were obtained from a  
259 recent computational study<sup>17</sup>. In CG simulations, the protein backbone is rigid, but proteins  
260 freely rotate and diffuse relative to lipid and solvent molecules. In our case, due to periodic  
261 boundary conditions, the minimal inter-channel distance fluctuates between the two simulated  
262 channels, either within the same box or between mirrored boxes (Figure 6a). At both  
263 temperatures, the minimal pore-pore distance between closed channels remain  $> 40 \text{ nm}$  during  
264 the entire trajectory, while for open channels, this distance decreased by 20~30 nm over the same  
265 duration (Figure 6c and Supplementary Figure 9). These results are consistent with a long-range  
266 footprint overlap energy penalty preventing closed channels to get closer through random  
267 diffusion.

268 Besides inter-channel distance, our mechanism predicts that increasing the number of  
269 open channels would reduce the rate of channel closure, without modulating the rate of channel  
270 opening. To test these predictions, we evoked PIEZO-mediated macroscopic currents using a  
271 saturating -100 mmHg pressure pulse of a short duration to prevent the development of  
272 inactivation. We determined the time course of activation/deactivation by fitting the  
273 rising/decaying phase of current traces upon application/removal of the pressure stimulus with a  
274 mono-exponential function. Plotting activation and deactivation time constants as a function of  
275 the absolute amplitude of the peak current,  $|I_{max}|$ , seems to confirm our mechanism. As  $|I_{max}|$   
276 increases, channel closure drastically slows down while channel opening accelerates only  
277 slightly. Pearson's correlation coefficient between  $|I_{max}|$  and closure time constant is  $\approx 0.76$ ,  
278 while Pearson's correlation coefficient between opening time constant and  $|I_{max}|$  is  $\approx -0.44$ . A

279 linear regression analysis further shows that, for the same increase of  $|I_{max}|$ , the slowing down  
280 of channel closure is about 10-fold larger than the acceleration of channel opening (linear slope  
281 of  $6.42 \pm 1.12 \text{ ms nA}^{-1}$  vs.  $-0.61 \pm 2.79 \text{ ms nA}^{-1}$ ) (Figure 7).

282 Finally, our proposed mechanism postulates that the strength of cooperative effects is  
283 proportional to the energy penalty that would be incurred if adjacent channels were to overlap

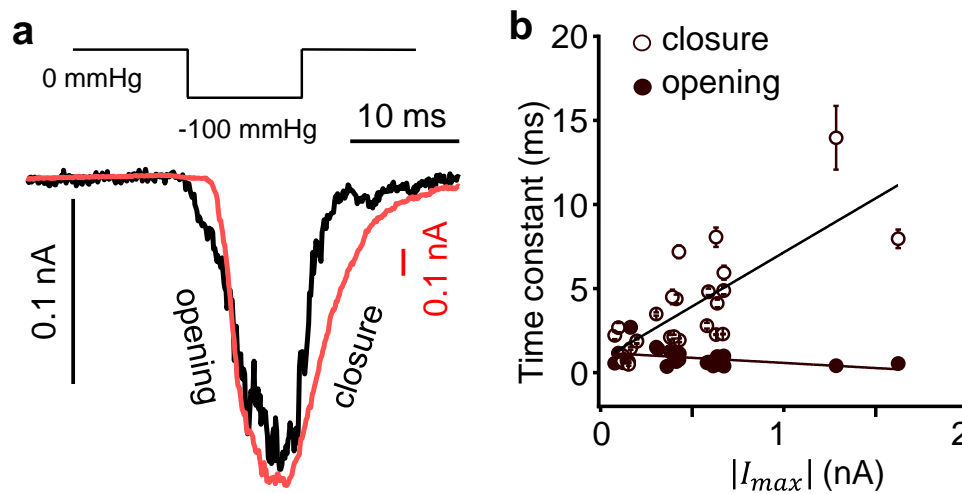

**Figure 7. PIEZO1 channels close more slowly when more channels open in the patch.** (a) Example of macroscopic PIEZO1 current traces of different amplitude obtained with a 10 ms saturating pressure pulse.  $V = -100 \text{ mV}$ . (b) The time constant of activation (opening, open circles) and deactivation (closure, filled circles) is plotted as a function of the absolute value of maximal current amplitude ( $|I_{max}|$ ). Circles represent independent patches. Error bars = s.e.m. from exponential fit. Lines represent linear fits to the data using  $y = a + bx$ . Fitted parameters:  $a = 1.19 \pm 0.16 \text{ ms}$  (activation) and  $0.74 \pm 0.66 \text{ ms}$  (deactivation); and  $b = -0.61 \pm 2.79 \text{ ms nA}^{-1}$  (activation) and  $6.42 \pm 1.12 \text{ ms nA}^{-1}$  (deactivation).

284 their footprints. In a channel cluster, this energy penalty should depend on both the number and  
285 surface area of individual PIEZO footprints. Remarkably, the decay length of individual footprint  
286 is predicted to shrink as membrane tension increases<sup>15</sup>. Thus, for the same number of open  
287 channels, increasing membrane patch pressure is predicted to reduce the total gating free energy  
288 contributed by inter-channel cooperativity. Consequently, the cooperative effects are anticipated

289 to decrease as tension increases. This is well consistent with our observation that the value of the  
290 fitted  $k$  parameter decreases with increasing patch pressure, from  $\approx 2.25$  at  $-20$  mmHg to  $\approx 1.31$   
291 at  $-90$  mmHg (Figure 3).

292

## 293 **Discussion**

294 Mechanosensitive ion channels have long been suspected to energetically influence each other  
295 through cooperative effects. Due to their elastic properties, lipid bilayers propagate membrane  
296 deformations induced by distinct channel states, promoting nearby channels to adopt similar  
297 conformations. In most cases described in the literature, these inter-channel cooperative effects  
298 are mediated by a change of membrane thickness resulting from the hydrophobic mismatch  
299 between hydrophobic protein domains and surrounding lipids<sup>24-28</sup>. However, membrane thinning  
300 and thickening rapidly decay with lateral distance and most of membrane deformation free  
301 energy is brought about by the first annulus of lipids in contact with the protein<sup>29</sup>, thus  
302 dramatically limiting the spatial range of cooperative effects. In contrast, our proposed  
303 cooperative mechanism occurs through membrane curvature, which is predicted to decay over  
304 much longer distances (in typical cell membranes), enabling PIEZO1 channels to potentially  
305 influence each other over distances exceeding tens of nanometers<sup>15</sup>.

306 Our mechanism is consistent with electrophysiology experiments showing collective  
307 PIEZO1 gating properties and imaging experiments revealing fluorescently-labeled PIEZO1  
308 channels produce dense fluorescent puncta in cell membranes<sup>17,23,30,31</sup>. PIEZO1 puncta seemingly  
309 exhibit a large heterogeneity of size and intensity, suggesting they harbor a variable number of  
310 channels. Our mathematical model provides a hypothetical range for the average number of  
311 cooperating channels in macroscopic recordings (7 to 15). This number may correspond to the  
312 average number of channels per cluster. A more direct experimental approach will be needed to  
313 confirm these estimates. Our data further suggests that the free energy change associated with  
314 opening of a single channel only decreases by  $\approx 3.1 k_B T$  when patch pressure is reduced from 0  
315 to -90 mmHg (assuming  $P_o^{max} = 1$ ). In contrast, increasing the number of channels from 1 to 15

316 at a constant pressure of -20 mmHg would decrease activation free energy by  $\approx 10.5 k_B T$ . Thus,  
317 the gating free energy of PIEZO1 activation in large channel clusters is predicted to be  
318 dominated by cooperative effects rather than membrane tension.

319 Our mathematical model is likely too simplistic for several reasons. First, our assumption  
320 that the activation constant scales by a constant factor each time a channel opens may not capture  
321 the complex interplay between membrane energetics and channel diffusion. The cooperativity  
322 factor should depend not only on the number of open channels, but also on the average distance  
323 between them as channels move laterally in the membrane. Second, our model assumes all  
324 channels energetically interact with each other in a membrane patch. However, these channels  
325 could be arranged in a variety of cluster configurations that cannot be probed  
326 electrophysiologically. While it is reasonable to assume all channels mutually interact within a  
327 cluster, it is unclear whether channels from distinct clusters would energetically interact. A  
328 deeper understanding of PIEZO1 cooperativity would thus require considering channel diffusion,  
329 conformation, membrane footprint energetics and clustering dynamics.

330 PIEZO1 inactivation is affected by the presence of specific lipids<sup>32,33</sup>, metal ions<sup>30</sup>,  
331 disease mutations<sup>34</sup>, as well as external pH<sup>35</sup>, membrane potential<sup>36</sup>, and other unknown cellular  
332 factors<sup>37</sup>. In addition to this long list, our study shows that the rate of PIEZO1 inactivation  
333 accelerates as more channels open in a patch. Our data also show that the mean open state dwell  
334 time lengthens when more channels open. Assuming PIEZO1 inactivation is mediated by  
335 stochastic transitions from open to inactivated states, lengthening the duration of opening events  
336 would increase the probability of inactivation transitions. The increased surge of ionic flow  
337 mediated through cooperative effects may thus be limited by a concomitant acceleration of

338 channel inactivation. Further studies will be needed to probe the link between inter-channel  
339 cooperativity and PIEZO1 inactivation.

340         The modulation of PIEZO1 channels by inter-channel cooperativity has profound  
341 physiological implications. This mode of regulation may explain how PIEZO1 channels sense  
342 mechanical stimuli across many orders of magnitude, from minute forces induced by capillary  
343 lymph flow<sup>38,39</sup> to stronger forces induced by arterial blood flow and pressure<sup>40-44</sup>. Our data  
344 suggest reducing the number of channels per PIEZO1 cluster would reduce cellular  
345 mechanosensitivity and *vice versa*. This hypothetical mode of channel regulation would  
346 constitute a remarkably effective mechanism to modulate cellular mechanosensitivity without  
347 altering the total number of channels at the cell surface, which would require slow and costly  
348 membrane trafficking processes. Such a potential regulatory mechanism seems plausible, as a  
349 recent study suggests cell migration is accompanied by a dynamic redistribution of endogenous  
350 PIEZO1 channels at the cell surface<sup>45</sup>. Future studies will be needed to determine if and how  
351 channel density in PIEZO1 clusters changes as a function of physiological and pathological  
352 contexts.

353         Since PIEZO1 and PIEZO2 share the same structure<sup>10-13</sup>, it is tempting to speculate that  
354 PIEZO2 channels energetically interact similarly to PIEZO1, a phenomenon that would explain  
355 the ability of PIEZO2-dependent mechanoreceptors to sense a large amplitude range of  
356 mechanical forces, from gentle touch to large visceral pressures<sup>40,46-48</sup>. However, while both  
357 PIEZO1 and PIEZO2 exquisitely respond to positive patch pressurization, PIEZO2 is reportedly  
358 weakly sensitive to negative pressurization, suggesting profound differences in tension-sensing  
359 mechanism between the two mammalian PIEZO homologs<sup>3,46</sup>. Further experiments are needed to  
360 assess whether PIEZO2 channels gate in a cooperative manner.

361 **Author contributions**

362 T.W, A.D.O and J.J.L conceived the project; T.W. performed electrophysiology experiments;  
363 T.W, A.D.O, and J.J.L. analyzed data, A.D.O. performed MATLAB simulations; W.Y and Y.L  
364 performed and analyzed molecular dynamics simulations; J.J.L derived equations and wrote the  
365 manuscript with input from all authors.

366

367

368 **Acknowledgment**

369 We thank Dr. Medha Pathak for critical reading of the manuscript. This work was supported by  
370 NIH grant GM130834 to Y.L and J.J.L.

371



## 372 **References**

- 373 1 Kefauver, J. M., Ward, A. B. & Patapoutian, A. Discoveries in structure and physiology of  
374 mechanically activated ion channels. *Nature* **587**, 567-576, doi:10.1038/s41586-020-2933-1  
375 (2020).
- 376 2 Syeda, R. *et al.* Piezo1 Channels Are Inherently Mechanosensitive. *Cell Rep* **17**, 1739-1746,  
377 doi:10.1016/j.celrep.2016.10.033 (2016).
- 378 3 Lewis, A. H. & Grandl, J. Mechanical sensitivity of Piezo1 ion channels can be tuned by cellular  
379 membrane tension. *Elife* **4**, doi:10.7554/eLife.12088 (2015).
- 380 4 Cox, C. D. *et al.* Removal of the mechanoprotective influence of the cytoskeleton reveals PIEZO1  
381 is gated by bilayer tension. *Nat Commun* **7**, 10366, doi:10.1038/ncomms10366 (2016).
- 382 5 Maksaev, G., Milac, A., Anishkin, A., Guy, H. R. & Sukharev, S. Analyses of gating thermodynamics  
383 and effects of deletions in the mechanosensitive channel TREK-1 Comparisons with structural  
384 models. *Channels* **5**, 34-42, doi:10.4161/chan.5.1.13906 (2011).
- 385 6 Moe, P. & Blount, P. Assessment of potential stimuli for mechano-dependent gating of MscL:  
386 effects of pressure, tension, and lipid headgroups. *Biochemistry* **44**, 12239-12244,  
387 doi:10.1021/bi0509649 (2005).
- 388 7 Nomura, T. *et al.* Differential effects of lipids and lyso-lipids on the mechanosensitivity of the  
389 mechanosensitive channels MscL and MscS. *Proc. Natl. Acad. Sci. U. S. A.* **109**, 8770-8775,  
390 doi:10.1073/pnas.1200051109 (2012).
- 391 8 Sukharev, S. Purification of the small mechanosensitive channel of Escherichia coli (MscS): the  
392 subunit structure, conduction, and gating characteristics in liposomes. *Biophys. J.* **83**, 290-298,  
393 doi:10.1016/S0006-3495(02)75169-2 (2002).
- 394 9 Sukharev, S. Mechanosensitive channels in bacteria as membrane tension reporters. *FASEB J.* **13**,  
395 S55-S61 (1999).
- 396 10 Wang, L. *et al.* Structure and mechanogating of the mammalian tactile channel PIEZO2. *Nature*  
397 **573**, 225-229, doi:10.1038/s41586-019-1505-8 (2019).
- 398 11 Zhao, Q. *et al.* Structure and mechanogating mechanism of the Piezo1 channel. *Nature*,  
399 doi:10.1038/nature25743 (2018).
- 400 12 Saotome, K. *et al.* Structure of the mechanically activated ion channel Piezo1. *Nature* **554**, 481-  
401 486, doi:10.1038/nature25453 (2018).
- 402 13 Guo, Y. R. & MacKinnon, R. Structure-based membrane dome mechanism for Piezo  
403 mechanosensitivity. *Elife* **6**, doi:10.7554/eLife.33660 (2017).
- 404 14 Lin, Y. C. *et al.* Force-induced conformational changes in PIEZO1. *Nature* **573**, 230-234,  
405 doi:10.1038/s41586-019-1499-2 (2019).
- 406 15 Haselwandter, C. A. & MacKinnon, R. Piezo's membrane footprint and its contribution to  
407 mechanosensitivity. *Elife* **7**, doi:10.7554/eLife.41968 (2018).
- 408 16 Syeda, R. *et al.* Chemical activation of the mechanotransduction channel Piezo1. *Elife* **4**,  
409 doi:10.7554/eLife.07369 (2015).
- 410 17 Jiang, W. *et al.* Crowding-induced opening of the mechanosensitive Piezo1 channel in silico.  
411 *Communications Biology* **4**, 84, doi:10.1038/s42003-020-01600-1 (2021).
- 412 18 Lukacs, V. *et al.* Impaired PIEZO1 function in patients with a novel autosomal recessive congenital  
413 lymphatic dysplasia. *Nat Commun* **6**, 8329, doi:10.1038/ncomms9329 (2015).
- 414 19 Coste, B. *et al.* Piezo1 and Piezo2 are essential components of distinct mechanically activated  
415 cation channels. *Science* **330**, 55-60, doi:10.1126/science.1193270 (2010).

- 416 20 Lacroix, J. J., Botello-Smith, W. M. & Luo, Y. Probing the gating mechanism of the  
417 mechanosensitive channel Piezo1 with the small molecule Yoda1. *Nature Communications* **9**,  
418 2029, doi:10.1038/s41467-018-04405-3 (2018).
- 419 21 Wang, Y. *et al.* A lever-like transduction pathway for long-distance chemical- and mechano-gating  
420 of the mechanosensitive Piezo1 channel. *Nat Commun* **9**, 1300, doi:10.1038/s41467-018-03570-  
421 9 (2018).
- 422 22 Jing Wang, Jinghui Jiang, Xuzhong Yang, Li Wang & Xiao, B. Tethering Piezo channels to the actin  
423 cytoskeleton for mechanogating via the E-cadherin- $\beta$ -catenin mechanotransduction complex.  
424 *BioRxiv*, doi:doi.org/10.1101/2020.05.12.092148 (2020).
- 425 23 Ridone, P. *et al.* Disruption of membrane cholesterol organization impairs the activity of PIEZO1  
426 channel clusters. *J. Gen. Physiol.* **152**, doi:10.1085/jgp.201912515 (2020).
- 427 24 Goforth, R. L. *et al.* Hydrophobic coupling of lipid bilayer energetics to channel function. *J. Gen.*  
428 *Physiol.* **121**, 477-493, doi:10.1085/jgp.200308797 (2003).
- 429 25 Haselwandter, C. A. & Phillips, R. Directional interactions and cooperativity between  
430 mechanosensitive membrane proteins. *Europhys Lett* **101**, 68002p68001-68002p68006,  
431 doi:10.1209/0295-5075/101/68002 (2013).
- 432 26 Gianoli, F., Risler, T. & Kozlov, A. S. Lipid bilayer mediates ion-channel cooperativity in a model of  
433 hair-cell mechanotransduction. *Proc. Natl. Acad. Sci. U. S. A.* **114**, E11010-E11019,  
434 doi:10.1073/pnas.1713135114 (2017).
- 435 27 Gianoli, F., Risler, T. & Kozlov, A. S. The Development of Cooperative Channels Explains the  
436 Maturation of Hair Cell's Mechanotransduction. *Biophys. J.* **117**, 1536-1548,  
437 doi:10.1016/j.bpj.2019.08.042 (2019).
- 438 28 Zhu, L. *et al.* Interaction between mechanosensitive channels embedded in lipid membrane. *J*  
439 *Mech Behav Biomed Mater* **103**, 103543, doi:10.1016/j.jmbbm.2019.103543 (2020).
- 440 29 Nielsen, C., Goulian, M. & Andersen, O. S. Energetics of inclusion-induced bilayer deformations.  
441 *Biophys. J.* **74**, 1966-1983, doi:10.1016/S0006-3495(98)77904-4 (1998).
- 442 30 Gottlieb, P. A., Bae, C. & Sachs, F. Gating the mechanical channel Piezo1: a comparison between  
443 whole-cell and patch recording. *Channels (Austin)* **6**, 282-289, doi:10.4161/chan.21064 (2012).
- 444 31 Ellefsen, K. L. *et al.* Myosin-II mediated traction forces evoke localized Piezo1-dependent Ca(2+)  
445 flickers. *Commun Biol* **2**, 298, doi:10.1038/s42003-019-0514-3 (2019).
- 446 32 Shi, J. *et al.* Sphingomyelinase Disables Inactivation in Endogenous PIEZO1 Channels. *Cell Rep* **33**,  
447 108225, doi:10.1016/j.celrep.2020.108225 (2020).
- 448 33 Romero, L. O. *et al.* Dietary fatty acids fine-tune Piezo1 mechanical response. *Nat Commun* **10**,  
449 1200, doi:10.1038/s41467-019-09055-7 (2019).
- 450 34 Bae, C., Gnanasambandam, R., Nicolai, C., Sachs, F. & Gottlieb, P. A. Xerocytosis is caused by  
451 mutations that alter the kinetics of the mechanosensitive channel PIEZO1. *Proc. Natl. Acad. Sci.*  
452 *U. S. A.* **110**, E1162-1168, doi:10.1073/pnas.1219777110 (2013).
- 453 35 Bae, C., Sachs, F. & Gottlieb, P. A. Protonation of the human PIEZO1 ion channel stabilizes  
454 inactivation. *J. Biol. Chem.* **290**, 5167-5173, doi:10.1074/jbc.M114.604033 (2015).
- 455 36 Wu, J. *et al.* Inactivation of Mechanically Activated Piezo1 Ion Channels Is Determined by the C-  
456 Terminal Extracellular Domain and the Inner Pore Helix. *Cell Rep* **21**, 2357-2366,  
457 doi:10.1016/j.celrep.2017.10.120 (2017).
- 458 37 Del Marmol, J. I., Touhara, K. K., Croft, G. & MacKinnon, R. Piezo1 forms a slowly-inactivating  
459 mechanosensory channel in mouse embryonic stem cells. *Elife* **7**, doi:10.7554/eLife.33149 (2018).
- 460 38 Choi, D. *et al.* Piezo1 incorporates mechanical force signals into the genetic program that governs  
461 lymphatic valve development and maintenance. *JCI Insight* **4**, doi:10.1172/jci.insight.125068  
462 (2019).

- 463 39 Nonomura, K. *et al.* Mechanically activated ion channel PIEZO1 is required for lymphatic valve  
464 formation. *Proc. Natl. Acad. Sci. U. S. A.*, doi:10.1073/pnas.1817070115 (2018).
- 465 40 Zeng, W. Z. *et al.* PIEZO1s mediate neuronal sensing of blood pressure and the baroreceptor reflex.  
466 *Science* **362**, 464-467, doi:10.1126/science.aau6324 (2018).
- 467 41 Rode, B. *et al.* Piezo1 channels sense whole body physical activity to reset cardiovascular  
468 homeostasis and enhance performance. *Nat Commun* **8**, 350, doi:10.1038/s41467-017-00429-3  
469 (2017).
- 470 42 Wang, S. *et al.* Endothelial cation channel PIEZO1 controls blood pressure by mediating flow-  
471 induced ATP release. *J. Clin. Invest.* **126**, 4527-4536, doi:10.1172/JCI87343 (2016).
- 472 43 Li, J. *et al.* Piezo1 integration of vascular architecture with physiological force. *Nature* **515**, 279-  
473 282, doi:10.1038/nature13701 (2014).
- 474 44 Jiang, F. *et al.* The mechanosensitive Piezo1 channel mediates heart mechano-chemo  
475 transduction. *Nat Commun* **12**, 869, doi:10.1038/s41467-021-21178-4 (2021).
- 476 45 Jesse R. Holt *et al.* Spatiotemporal dynamics of PIEZO1 localization controls keratinocyte migration  
477 during wound healing. *BioRxiv*, doi:<https://doi.org/10.1101/2020.10.18.344598> (2020).
- 478 46 Shin, K. C. *et al.* The Piezo2 ion channel is mechanically activated by low-threshold positive  
479 pressure. *Sci. Rep.* **9**, 6446, doi:10.1038/s41598-019-42492-4 (2019).
- 480 47 Woo, S. H. *et al.* Piezo2 is required for Merkel-cell mechanotransduction. *Nature* **509**, 622-626,  
481 doi:10.1038/nature13251 (2014).
- 482 48 Marshall, K. L. *et al.* PIEZO2 in sensory neurons and urothelial cells coordinates urination. *Nature*,  
483 doi:10.1038/s41586-020-2830-7 (2020).

484
